# Supplementary material for: DNA Methylation and Chromatin Accessibility Impact Subgenome Expression Dominance in the Common Carp (Cyprinus carpio)
Source: MDPI journal article supplement (doi:10.3390/ijms25031635), 2024-01-29
Supplement: s1 [file s1]

## Contents

|                                                                                                                                   |   |
|-----------------------------------------------------------------------------------------------------------------------------------|---|
| Supplementary Table S1. Summary of RNA-seq reads used in this study.....                                                          | 2 |
| Supplementary Table S2. GO enrichment analysis of genes with significantly higher expression levels in liver than in muscle. .... | 3 |
| Supplementary Table S3. GO enrichment analysis of genes with significantly higher expression levels in muscle than in liver. .... | 4 |
| Supplementary Table S4. GO enrichment scores for different classes of genes highly expressed in liver. ....                       | 5 |
| Supplementary Table S5. GO enrichment scores for different classes of genes highly expressed in muscle...                         | 6 |
| Supplementary Table S6. Summary of whole genome bisulfite sequencing statistics.....                                              | 7 |
| Supplementary Table S7. Summary of ATAC-seq reads.....                                                                            | 8 |

**Supplementary Table S1. Summary of RNA-seq reads used in this study.**

|                             | Liver       |             |             | Muscle      |             |             |
|-----------------------------|-------------|-------------|-------------|-------------|-------------|-------------|
|                             | Replicate 1 | Replicate 2 | Replicate 3 | Replicate 1 | Replicate 2 | Replicate 3 |
| Raw Reads Pairs             | 22,039,085  | 25,125,441  | 22,047,130  | 25,371,639  | 19,624,616  | 16,976,819  |
| Clean Reads Pairs           | 22,013,867  | 25,095,090  | 22,021,047  | 25,332,516  | 19,593,014  | 16,947,641  |
| Adapter rate (%)            | 1.23        | 1.08        | 0.95        | 0.83        | 0.91        | 0.80        |
| Clean data rate (%)         | 99.89       | 99.88       | 99.88       | 99.85       | 99.84       | 99.82       |
| Unique alignment rate (%)   | 80.68       | 80.69       | 80.71       | 84.82       | 84.85       | 79.20       |
| Multiple alignment rate (%) | 5.36        | 5.37        | 5.36        | 5.64        | 5.65        | 11.24       |
| Chimera alignment rate (%)  | 7.85        | 7.81        | 7.85        | 6.25        | 6.17        | 3.32        |
| Overall alignment rate (%)  | 93.89       | 93.87       | 93.93       | 96.71       | 96.68       | 93.75       |

**Supplementary Table S2. GO enrichment analysis of genes with significantly higher expression levels in liver than in muscle.**

(in a separate excel file)

**Supplementary Table S3. GO enrichment analysis of genes with significantly higher expression levels in muscle than in liver.**

(in a separate excel file)

**Supplementary Table S4. GO enrichment scores for different classes of genes highly expressed in liver.**

(in a separate excel file)

**Supplementary Table S5. GO enrichment scores for different classes of genes highly expressed in muscle.**

(in a separate excel file)

**Supplementary Table S6. Summary of whole genome bisulfite sequencing statistics.**

|                                 | Liver       |             |             | Muscle      |             |             |
|---------------------------------|-------------|-------------|-------------|-------------|-------------|-------------|
|                                 | Replicate 1 | Replicate 2 | Replicate 3 | Replicate 1 | Replicate 2 | Replicate 3 |
| Raw Reads Pairs                 | 108,468,166 | 98,138,497  | 89,071,557  | 89,086,432  | 100,847,226 | 113,060,725 |
| Clean Reads Pairs               | 108,463,926 | 98,134,591  | 89,068,767  | 89,085,070  | 100,845,873 | 113,059,223 |
| Clean Data Rate (%)             | 99.99       | 99.99       | 99.99       | 99.99       | 99.99       | 99.99       |
| Mapped Pairs Rate (%)           | 73.90       | 74.00       | 74.10       | 72.90       | 73.00       | 73.20       |
| Unique Mapped Pairs<br>Rate (%) | 68.60       | 68.60       | 68.70       | 67.50       | 67.60       | 67.70       |
| Non-Unique Mapped<br>Rate (%)   | 5.30        | 5.30        | 5.40        | 5.40        | 5.40        | 5.50        |
| Conversion Efficiency<br>(%)    | 99.73       | 99.72       | 99.71       | 99.70       | 99.72       | 99.71       |

**Supplementary Table S7. Summary of ATAC-seq reads.**

|                                | Liver       |             |             | Muscle      |             |             |
|--------------------------------|-------------|-------------|-------------|-------------|-------------|-------------|
|                                | Replicate 1 | Replicate 2 | Replicate 3 | Replicate 1 | Replicate 2 | Replicate 3 |
| Raw Reads Pairs                | 25,747,154  | 27,677,904  | 27,530,236  | 29,446,998  | 26,407,728  | 23,093,350  |
| Clean Reads Pairs              | 16,256,034  | 18,300,094  | 16,240,925  | 20,183,932  | 19,299,924  | 15,516,015  |
| Clean data rate (%)            | 63.12       | 66.12       | 59.00       | 68.54       | 73.08       | 67.19       |
| Unique alignment<br>rate (%)   | 45.08       | 45.33       | 44.57       | 47.24       | 47.97       | 47.19       |
| Multiple alignment<br>rate (%) | 41.88       | 42.20       | 43.03       | 44.28       | 43.81       | 44.53       |
| Chimera alignment<br>rate (%)  | 1.76        | 1.53        | 1.32        | 1.16        | 1.34        | 1.14        |
| Overall alignment<br>rate (%)  | 88.71       | 89.06       | 88.92       | 92.68       | 93.11       | 92.86       |
